# Supplementary material for: Transcriptome Analysis of Resistant and Susceptible Alfalfa Cultivars Infected With Root-Knot Nematode Meloidogyne incognita
Source: PLoS One. 2015 Feb 24;10(2):e0118269. doi: 10.1371/journal.pone.0118269 (PMC4339843; doi:10.1371/journal.pone.0118269)
Supplement: S6 Table — (XLSX) [file pone.0118269.s009.xlsx]

## Sheet: Lahontan
Supplementary Table S6. MapMan annotations, cv. Lahontan
BinCode	BinName	ID	Expression
20.1	stress.biotic	imga|medtr3g056190.1	2.33183
20.1	stress.biotic	imga|medtr3g011300.1	1.54422
20.1	stress.biotic	imga|medtr8g075550.1	-2.30474
20.1	stress.biotic	imga|medtr3g011280.1	1.78153
20.1	stress.biotic	imga|medtr5g027860.1	1.13312
20.1	stress.biotic	imga|ac235665_30.1	1.78153
20.1	stress.biotic	imga|medtr3g027330.1	1.80308
20.1	stress.biotic	imga|medtr3g011390.1	2.79796
20.1	stress.biotic	imga|medtr3g011270.1	1.78153
20.1	stress.biotic	imga|medtr3g011370.1	1.03048
20.1	stress.biotic	imga|medtr7g071940.1	-2.83247
20.1	stress.biotic	imga|medtr3g056410.1	2.94074
20.1	stress.biotic	imga|medtr5g035480.1	-1.2233
20.1	stress.biotic	imga|medtr3g056310.1	2.16262
20.1	stress.biotic	imga|medtr3g017620.1	1.48898
20.1	stress.biotic	imga|ac235665_29.1	1.54422
20.1	stress.biotic	imga|medtr5g028610.1	1.60208
20.1	stress.biotic	imga|medtr3g048910.1	-2.95029
20.1	stress.biotic	imga|medtr3g056380.1	2.43282
20.1	stress.biotic	imga|medtr5g027910.1	1.02611
20.1.7	stress.biotic.PR-proteins	imga|medtr3g022300.1	2.89746
20.1.7	stress.biotic.PR-proteins	imga|medtr2g012940.1	2.0982
20.1.7	stress.biotic.PR-proteins	imga|medtr4g020590.1	1.24308
20.1.7	stress.biotic.PR-proteins	imga|ac233783_25.1	2.31948
20.1.7	stress.biotic.PR-proteins	imga|medtr4g023260.1	1.11595
20.1.7	stress.biotic.PR-proteins	imga|medtr2g039770.1	1.84671
20.1.7	stress.biotic.PR-proteins	imga|medtr4g080330.1	2.62107
20.1.7	stress.biotic.PR-proteins	imga|medtr6g087170.1	2.31948
20.1.7	stress.biotic.PR-proteins	imga|medtr2g012770.1	2.30127
20.1.7	stress.biotic.PR-proteins	imga|medtr4g015030.1	-2.98941
20.1.7	stress.biotic.PR-proteins	imga|medtr7g078790.1	2.17473
20.1.7	stress.biotic.PR-proteins	imga|medtr6g072310.1	-2.52249
20.1.7	stress.biotic.PR-proteins	imga|medtr3g022920.1	3.34517
20.1.7	stress.biotic.PR-proteins	imga|medtr6g087320.1	2.60888
20.1.7	stress.biotic.PR-proteins	imga|medtr8g079490.1	1.71042
20.1.7	stress.biotic.PR-proteins	imga|ac225526_5.1	2.98681
20.1.7	stress.biotic.PR-proteins	imga|ac202596_12.1	1.99241
20.1.7	stress.biotic.PR-proteins	imga|medtr7g025250.1	1.45716
20.1.7	stress.biotic.PR-proteins	imga|medtr3g028040.1	2.01014
20.1.7	stress.biotic.PR-proteins	imga|medtr6g087260.1	1.00824
20.1.7	stress.biotic.PR-proteins	imga|medtr6g080990.1	2.74471
20.1.7	stress.biotic.PR-proteins	imga|medtr3g022400.1	4.82184
20.1.7	stress.biotic.PR-proteins	imga|medtr3g027250.1	1.62961
20.1.7	stress.biotic.PR-proteins	imga|medtr5g085400.1	1.67393
20.1.7	stress.biotic.PR-proteins	imga|ac225526_3.1	2.52273
20.1.7	stress.biotic.PR-proteins	imga|medtr1g008240.1	1.60342
20.1.7	stress.biotic.PR-proteins	imga|medtr4g020550.1	1.65196
20.1.7	stress.biotic.PR-proteins	imga|medtr3g027200.1	2.21557
20.1.7	stress.biotic.PR-proteins	imga|medtr5g086810.1	-2.18002
20.1.7	stress.biotic.PR-proteins	imga|medtr3g030980.1	-1.86263
20.1.7	stress.biotic.PR-proteins	imga|medtr4g014300.1	2.95284
20.1.7	stress.biotic.PR-proteins	imga|medtr6g078930.1	2.63737
20.1.7	stress.biotic.PR-proteins	imga|medtr4g023400.1	2.61501
20.1.7	stress.biotic.PR-proteins	imga|medtr8g020290.1	1.02422
20.1.7	stress.biotic.PR-proteins	imga|medtr4g015060.1	-2.03463
20.1.7	stress.biotic.PR-proteins	imga|medtr8g018480.1	-3.05242
20.1.7	stress.biotic.PR-proteins	imga|medtr8g062130.1	1.79725
20.1.7	stress.biotic.PR-proteins	imga|medtr3g032760.1	2.30229
20.1.7	stress.biotic.PR-proteins	imga|medtr6g072510.1	1.3985
20.1.7	stress.biotic.PR-proteins	imga|ac225526_15.1	2.03564
20.1.7	stress.biotic.PR-proteins	imga|medtr6g088260.1	2.72134
20.1.7	stress.biotic.PR-proteins	imga|medtr3g022600.1	-4.04584
20.1.7	stress.biotic.PR-proteins	imga|medtr6g088070.1	1.00824
20.1.7	stress.biotic.PR-proteins	imga|medtr4g081290.1	-2.50323
20.1.7	stress.biotic.PR-proteins	imga|medtr8g020360.1	1.00845
20.1.7	stress.biotic.PR-proteins	imga|medtr5g063740.1	-2.02627
20.1.7	stress.biotic.PR-proteins	imga|medtr6g072760.1	2.53213
20.1.7	stress.biotic.PR-proteins	imga|medtr5g092630.1	-2.949
20.1.7	stress.biotic.PR-proteins	imga|medtr4g020700.1	1.26677
20.1.7	stress.biotic.PR-proteins	imga|medtr4g019360.1	1.48734
20.1.7	stress.biotic.PR-proteins	imga|medtr8g062140.1	1.79725
20.1.7	stress.biotic.PR-proteins	imga|medtr4g014240.1	-1.78529
20.1.7	stress.biotic.PR-proteins	imga|medtr4g016610.1	-2.39594
20.1.7	stress.biotic.PR-proteins	imga|medtr7g078770.1	1.21811
20.1.7	stress.biotic.PR-proteins	imga|medtr3g036050.1	1.25998
20.1.7	stress.biotic.PR-proteins	imga|medtr3g022790.1	1.80248
20.1.7	stress.biotic.PR-proteins	imga|medtr6g072250.1	-2.19059
20.1.7	stress.biotic.PR-proteins	imga|medtr4g014570.1	-2.67138
20.1.7	stress.biotic.PR-proteins	imga|medtr3g027420.1	2.74255
20.2.1	stress.abiotic.heat	imga|medtr2g032550.1	1.62995
20.2.1	stress.abiotic.heat	imga|medtr7g024030.1	2.20393
20.2.1	stress.abiotic.heat	imga|medtr7g024390.1	1.78093
20.2.1	stress.abiotic.heat	imga|medtr2g040160.1	1.09384
20.2.1	stress.abiotic.heat	imga|medtr7g026030.1	-2.52942
20.2.1	stress.abiotic.heat	imga|medtr7g099680.1	3.61216
20.2.1	stress.abiotic.heat	imga|medtr5g081530.1	1.66173
20.2.1	stress.abiotic.heat	imga|medtr5g031610.1	1.8198
20.2.1	stress.abiotic.heat	imga|medtr6g061850.1	1.40635
20.2.99	stress.abiotic.unspecified	imga|medtr8g045560.1	-1.43083
20.2.99	stress.abiotic.unspecified	imga|medtr8g020630.1	-1.74992
20.2.99	stress.abiotic.unspecified	imga|medtr7g102770.1	-2.64049
20.2.99	stress.abiotic.unspecified	imga|medtr3g071470.1	-1.69665
31.4	cell.vesicle transport	imga|medtr7g026630.1	-3.15827
31.1	cell.organisation	imga|medtr8g098470.1	-1.85695
31.1	cell.organisation	imga|medtr8g038170.1	-1.68687
31.2	cell.division	imga|medtr5g063730.1	-1.34583
31.1	cell.organisation	imga|medtr5g063670.1	-1.10209
31.3	cell.cycle	imga|medtr1g038820.1	1.46333
31.3	cell.cycle	imga|medtr3g101280.1	1.85901
31.1	cell.organisation	imga|medtr5g028930.1	1.99432
31.1	cell.organisation	imga|medtr8g072510.1	3.90955
10.6.3	cell wall.degradation.pectate lyases and polygalacturonases	imga|ac233100_39.1	-3.03734
10.3.2	cell wall.hemicellulose synthesis.glucuronoxylan	imga|medtr4g133570.1	-2.88846
10.8.1	cell wall.pectin*esterases.PME	imga|medtr3g010780.1	-2.42737
10.6.3	cell wall.degradation.pectate lyases and polygalacturonases	imga|medtr8g068160.1	-2.39889
10.6.3	cell wall.degradation.pectate lyases and polygalacturonases	imga|ac233100_40.1	-2.06678
10.8.1	cell wall.pectin*esterases.PME	imga|medtr7g050980.1	-1.94927
10.7	cell wall.modification	imga|medtr7g084750.2	-1.86805
10.7	cell wall.modification	imga|medtr7g084750.1	-1.86805
10.6.2	cell wall.degradation.mannan-xylose-arabinose-fucose	imga|medtr5g062370.1	-1.6555
10.6.2	cell wall.degradation.mannan-xylose-arabinose-fucose	imga|medtr5g062530.1	-1.6555
10.5.1.1	cell wall.cell wall proteins.AGPs.AGP	imga|medtr2g017960.1	-1.37777
10.7	cell wall.modification	imga|medtr7g084760.2	-1.10065
10.7	cell wall.modification	imga|medtr7g084760.1	-1.10065
10.7	cell wall.modification	imga|medtr5g075320.1	-1.08822
10.7	cell wall.modification	imga|medtr4g097670.1	2.28913
17.5.3	hormone metabolism.ethylene.induced-regulated-responsive-activated	imga|medtr6g086280.2	-3.28179
17.5.3	hormone metabolism.ethylene.induced-regulated-responsive-activated	imga|medtr6g086280.3	-3.28179
17.5.3	hormone metabolism.ethylene.induced-regulated-responsive-activated	imga|medtr6g086280.1	-3.28179
17.5.2	hormone metabolism.ethylene.signal transduction	imga|medtr7g068070.1	-2.45191
17.2.3	hormone metabolism.auxin.induced-regulated-responsive-activated	imga|medtr3g026650.1	-2.16185
17.2.3	hormone metabolism.auxin.induced-regulated-responsive-activated	imga|medtr1g063950.1	-1.68346
17.1.1	hormone metabolism.abscisic acid.synthesis-degradation	imga|medtr3g109610.2	-1.64382
17.1.1	hormone metabolism.abscisic acid.synthesis-degradation	imga|medtr3g109610.1	-1.64382
17.5.2	hormone metabolism.ethylene.signal transduction	imga|medtr7g068160.1	-1.00744
17.2.3	hormone metabolism.auxin.induced-regulated-responsive-activated	imga|medtr1g061570.1	1.63695
17.5.1	hormone metabolism.ethylene.synthesis-degradation	imga|medtr2g069010.1	1.90622
17.5.1	hormone metabolism.ethylene.synthesis-degradation	imga|medtr8g074070.1	2.57948
17.5.1	hormone metabolism.ethylene.synthesis-degradation	imga|medtr8g074070.2	2.57948
17.5.2	hormone metabolism.ethylene.signal transduction	imga|medtr7g067970.1	3.57016
29.5.11.4.3.2	protein.degradation.ubiquitin.E3.SCF.FBOX	imga|medtr2g082880.1	2.87089
29.5.11.4.3.2	protein.degradation.ubiquitin.E3.SCF.FBOX	imga|ac235665_47.1	2.61304
29.5.11.4.3.2	protein.degradation.ubiquitin.E3.SCF.FBOX	imga|medtr3g011100.1	2.61304
29.5.11.4.3.2	protein.degradation.ubiquitin.E3.SCF.FBOX	imga|medtr7g021630.1	2.30164
29.5.11.4.3.2	protein.degradation.ubiquitin.E3.SCF.FBOX	imga|medtr3g030250.1	2.18423
29.5.11.4.3.2	protein.degradation.ubiquitin.E3.SCF.FBOX	imga|medtr4g006270.1	2.13664
29.5.11.4.3.2	protein.degradation.ubiquitin.E3.SCF.FBOX	imga|medtr6g018360.1	1.22683
29.5.11.4.3.2	protein.degradation.ubiquitin.E3.SCF.FBOX	imga|medtr2g025860.1	1.21619
29.5.11.4.3.2	protein.degradation.ubiquitin.E3.SCF.FBOX	imga|medtr3g023270.1	1.10382
29.5.11.4.3.2	protein.degradation.ubiquitin.E3.SCF.FBOX	imga|medtr3g010520.1	1.04337
29.5.11.4.3.2	protein.degradation.ubiquitin.E3.SCF.FBOX	imga|medtr3g010590.1	-1.77557
29.5.11.4.3.2	protein.degradation.ubiquitin.E3.SCF.FBOX	imga|ac145328_32.1	-2.26925
29.5.11.4.3.2	protein.degradation.ubiquitin.E3.SCF.FBOX	imga|medtr5g096630.1	-2.67716
29.5.11.4.3.2	protein.degradation.ubiquitin.E3.SCF.FBOX	imga|medtr4g092290.1	-4.46685
29.5.11.4.3.2	protein.degradation.ubiquitin.E3.SCF.FBOX	imga|medtr4g050930.1	-4.46685
29.5.11.4.3.2	protein.degradation.ubiquitin.E3.SCF.FBOX	imga|medtr5g073340.1	-4.80276
29.5.11.4.3.2	protein.degradation.ubiquitin.E3.SCF.FBOX	imga|medtr7g055870.1	-6.47939

## Sheet: Moapa
Table S6, cont. MapMan annotations, cv. Moapa 69
BinCode	BinName	ID	Expression
20.1.7	stress.biotic.PR-proteins	imga|medtr6g078600.1	-3.62813
20.1.7	stress.biotic.PR-proteins	imga|medtr6g078610.1	-3.62813
20.1.7	stress.biotic.PR-proteins	imga|medtr6g084360.1	-3.3672
20.1.7	stress.biotic.PR-proteins	imga|medtr8g020300.1	-2.6757
20.2.1	stress.abiotic.heat	imga|medtr7g026130.1	-2.48048
20.1.2	stress.biotic.receptors	imga|medtr6g078490.1	-2.35607
20.1.7	stress.biotic.PR-proteins	imga|medtr6g078490.1	-2.35607
20.1.7	stress.biotic.PR-proteins	imga|medtr6g087200.1	-2.28244
20.1.7.6.1	stress.biotic.PR-proteins.proteinase inhibitors.trypsin inhibitor	imga|medtr6g078290.1	-1.7045
20.1.7	stress.biotic.PR-proteins	imga|medtr3g062090.1	-1.6262
20.2.1	stress.abiotic.heat	imga|medtr2g083920.1	-1.41269
20.1	stress.biotic	imga|medtr5g090250.1	-1.35908
20.1.7	stress.biotic.PR-proteins	imga|medtr4g023040.1	1.11059
20.1	stress.biotic	imga|medtr3g031750.1	1.8078
20.1.7	stress.biotic.PR-proteins	imga|medtr6g072450.1	1.86146
20.1.7	stress.biotic.PR-proteins	imga|medtr6g072320.1	2.03041
20.1.7	stress.biotic.PR-proteins	imga|medtr8g041190.1	2.19711
31.1	cell.organisation	imga|medtr8g073260.1	-1.38396
31.1	cell.organisation	imga|medtr4g090050.1	-1.38396
31.2.5	cell.division.plastid	imga|medtr5g032090.1	-4.19749
29.5.11.4.3.2	protein.degradation.ubiquitin.E3.SCF.FBOX	imga|medtr1g016340.1	-2.3881
29.5.11.4.3.2	protein.degradation.ubiquitin.E3.SCF.FBOX	imga|medtr2g104340.1	-2.09109
29.2.1.2.1.4	protein.synthesis.ribosomal protein.eukaryotic.40S subunit.S4	imga|medtr8g052030.1	-1.81088
29.5.5	protein.degradation.serine protease	imga|medtr3g018740.1	-1.44828
29.5.5	protein.degradation.serine protease	imga|medtr5g097180.1	-1.39953
29.5.11.4.3.2	protein.degradation.ubiquitin.E3.SCF.FBOX	imga|medtr6g018400.1	-1.39616
29.5	protein.degradation	imga|medtr2g075770.1	-1.26872
29.2.1.2.2.11	protein.synthesis.ribosomal protein.eukaryotic.60S subunit.L11	imga|medtr8g046140.1	-1.02486
29.2.1.2.2.11	protein.synthesis.ribosomal protein.eukaryotic.60S subunit.L11	imga|medtr8g046140.2	-1.02486
29.5.11.4.2	protein.degradation.ubiquitin.E3.RING	imga|medtr8g023400.1	1.02853
29.5.11.4.2	protein.degradation.ubiquitin.E3.RING	imga|medtr1g082740.1	1.59179
29.2.4	protein.synthesis.elongation	imga|medtr6g023380.1	1.90922
29.1.16	protein.aa activation.cysteine-tRNA ligase	imga|medtr6g072080.1	1.97591
17.2.3	hormone metabolism.auxin.induced-regulated-responsive-activated	imga|medtr7g114970.3	-1.65825
17.2.3	hormone metabolism.auxin.induced-regulated-responsive-activated	imga|medtr7g114970.2	-1.65825
17.2.3	hormone metabolism.auxin.induced-regulated-responsive-activated	imga|medtr7g114970.5	-1.65825
17.2.3	hormone metabolism.auxin.induced-regulated-responsive-activated	imga|medtr7g114970.6	-1.65825
17.2.3	hormone metabolism.auxin.induced-regulated-responsive-activated	imga|medtr7g114970.4	-1.65825
17.2.3	hormone metabolism.auxin.induced-regulated-responsive-activated	imga|medtr7g114970.1	-1.65825
17.5.1	hormone metabolism.ethylene.synthesis-degradation	imga|medtr5g032880.1	-1.44996
17.5.1	hormone metabolism.ethylene.synthesis-degradation	imga|medtr5g032900.1	-1.44996
17.1.1	hormone metabolism.abscisic acid.synthesis-degradation	imga|medtr5g087390.1	-1.42561
17.2.3	hormone metabolism.auxin.induced-regulated-responsive-activated	imga|medtr7g021820.1	1.27094
17.5.2	hormone metabolism.ethylene.signal transduction	imga|medtr6g009610.1	1.77506
17.5.1	hormone metabolism.ethylene.synthesis-degradation	imga|medtr4g116010.1	2.46441
